# Supplementary material
Source: HighWire-hosted journal article supplement (https://adc.bmj.com/content/102/7/612)
Supplement: inline-supplementary-material-1 [file inline-supplementary-material-1.pdf]

Supplementary Table 1: Study sample characteristics in 4495 participants

| Study sample characteristics          | All participants |         |
|---------------------------------------|------------------|---------|
| Age, mean (SD)                        | 9.96             | (0.39)  |
| Sex, n(% female)                      | 2,337            | (52.0%) |
| Ethnic group, n(%)                    |                  |         |
| white European                        | 1,082            | (24.1%) |
| South Asians                          | 1,137            | (25.3%) |
| black African-Caribbean               | 1,237            | (27.5%) |
| Other                                 | 1,039            | (23.1%) |
| NS-SEC group, n(%)                    |                  |         |
| Managerial & professional occupations | 1,254            | (27.9%) |
| Intermediate occupations              | 1,154            | (25.7%) |
| Routine & manual occupations          | 1,374            | (30.6%) |
| Inactive                              | 462              | (10.3%) |
| Unclassified / Missing                | 251              | (5.6%)  |
| Month of measurement, n(%)            |                  |         |
| January                               | 547              | (12.2%) |
| February                              | 435              | (9.7%)  |
| March                                 | 373              | (8.3%)  |
| April                                 | 281              | (6.3%)  |
| May                                   | 437              | (9.7%)  |
| June                                  | 454              | (10.1%) |
| July                                  | 323              | (7.2%)  |
| September                             | 309              | (6.9%)  |
| October                               | 391              | (8.7%)  |
| November                              | 615              | (13.7%) |
| December                              | 330              | (7.3%)  |
